# Supplementary material for: Anthranilate phosphoribosyltransferase from the hyperthermophilic archaeon Thermococcus kodakarensis shows maximum activity with zinc and forms a unique dimeric structure
Source: PubMed Central journal article supplement (PMC5537072; doi:10.1002/2211-5463.12264), 2017-07-24
Supplement: FEB4-7-1217-s001.pdf [file FEB4-7-1217-s001.pdf]

## Supplementary material

Figure S1 Reaction catalyzed by TrpD

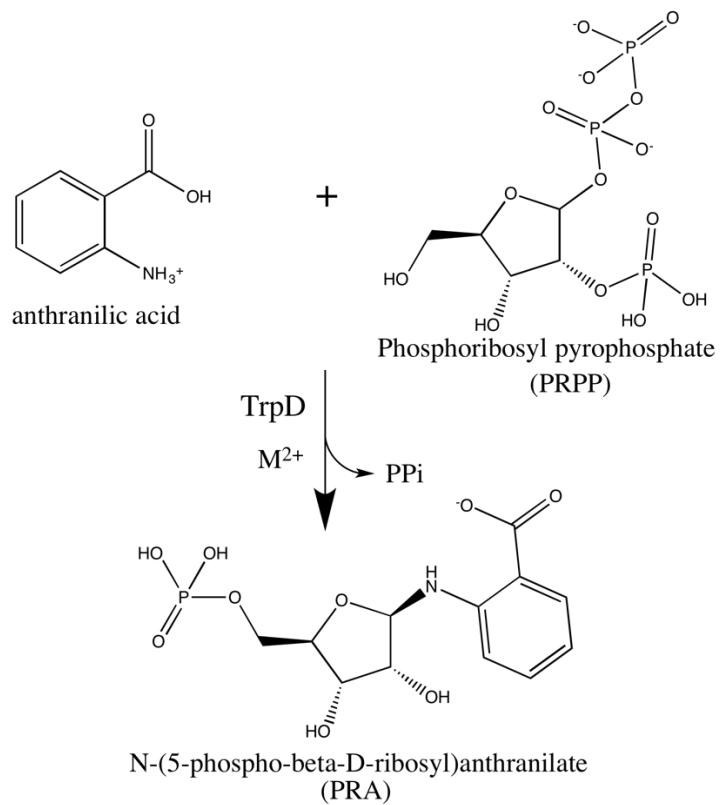

**Figure S2** Elution profile of *TkTrpD* from Superdex 75 10/300 gel filtration column. The retention volume (RV) is depicted on the X-axis. The buffer was 50 mM Tris-HCl, 150 mM NaCl, pH 8 and the flowrate 0.2 mL/min.

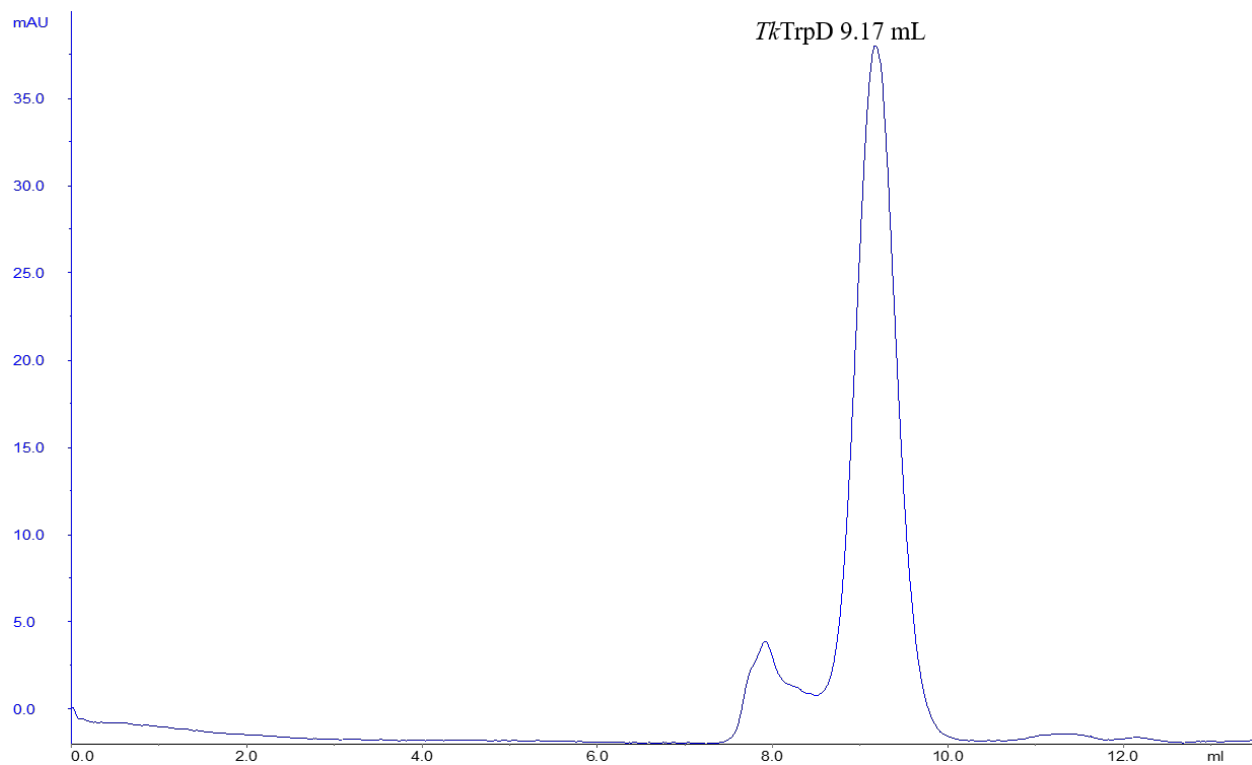

Gel-filtration chromatograph for *TkTrpD*. The chromatograph shows the protein peaks observed as A280 versus the retention volume.

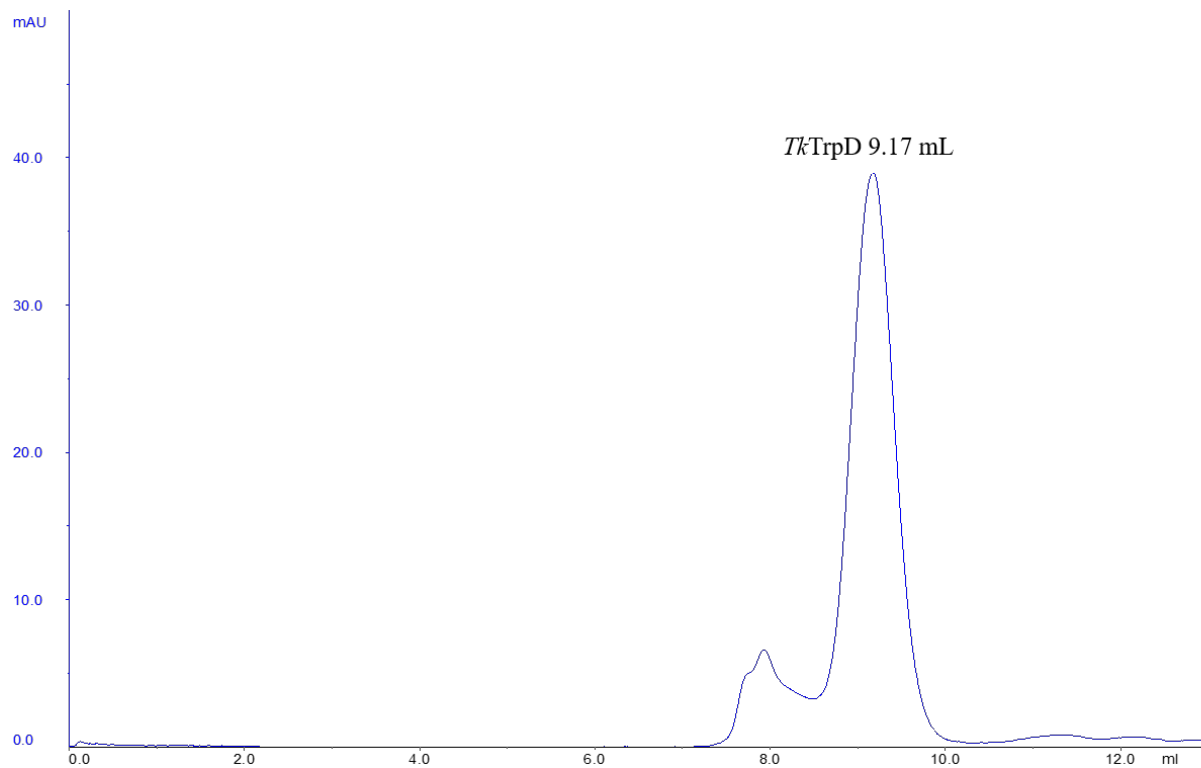

Gel-filtration chromatograph for *TkTrpD* in the presence of  $Zn^{2+}$ . The chromatograph shows the protein peaks observed as A280 versus the retention volume.

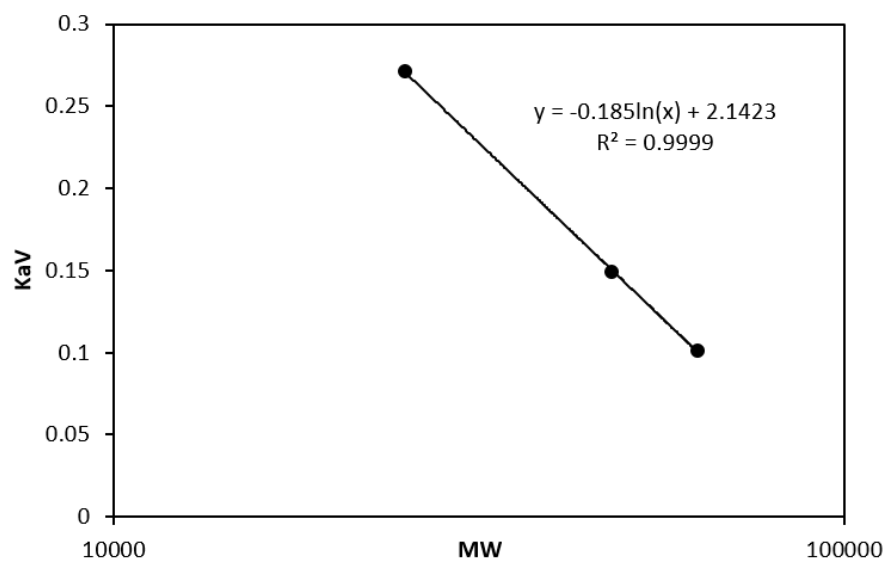

Standard curve for molecular weight determination of *TkTrpD* by gel filtration. The gel phase distribution coefficient ( $K_{av}$ ) values for standard proteins are plotted against log of their molecular weight.

**Figure S3** Optimal pH for *TkTrpD* enzymatic activity.

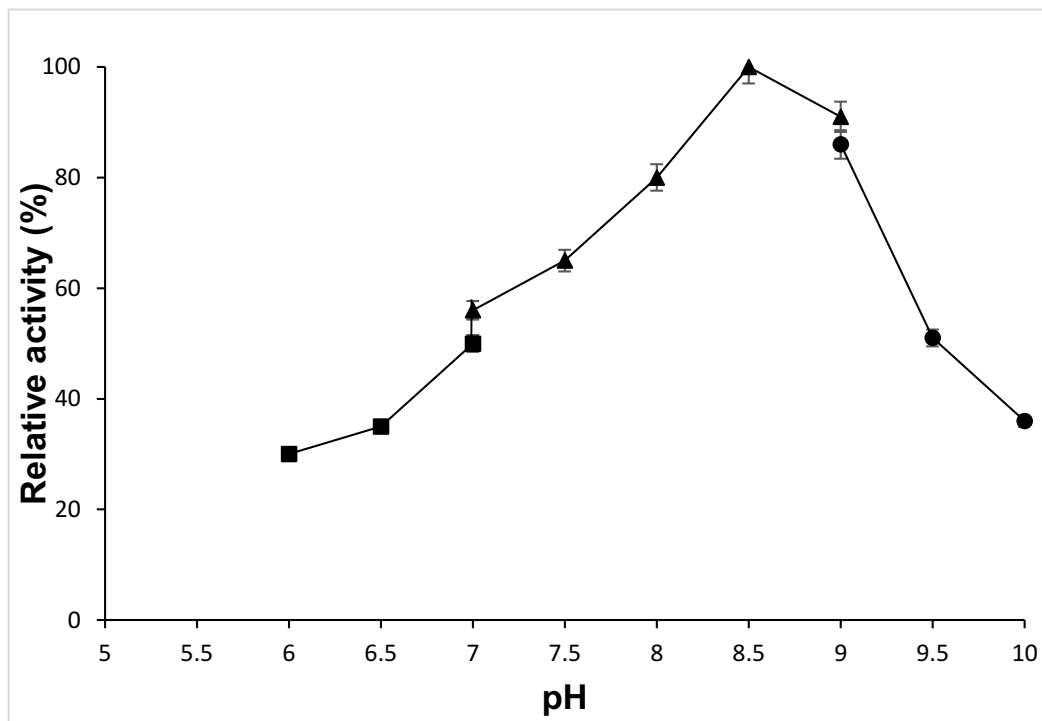

The activity assays were conducted at 55 °C in triplicates using Na-phosphate buffer (pH 6.0–7.0, rectangles); Tris-HCl buffer (pH 7.0–9.0, triangles) and Na-bicarbonate buffer (pH 9.0–10, circles).
